# Supplementary material
Source: Research Square preprint supplement (doi:10.21203/rs.3.rs-8775743/v1)
Supplement: Supplementary file 1 [file 3e953d4d4d8f5f9bf3ef2291.docx]

**Table 1.** The proximate composition of banana peels used in formulating the experimental diets.

| Parameter (% DM) | Banana peels | |
| --- | --- | --- |
| Unfermented | Fermented |
| Crude protein | 9.62 | 25.01 |
| Crude lipid | 9.38 | 6.02 |
| Fiber | 15.14 | 7.13 |
| Ash  NFE | 14.58  51.28 | 12.85  48.99 |

**Table 2**. Feed formulation and nutrient composition of the experimental diets.

|  | Experimental diets | | | | | | | | |
| --- | --- | --- | --- | --- | --- | --- | --- | --- | --- |
| Items | CON. | | | FBP25% | | FBP50% | FBP75% | FBP100% | |
|  | Feed formula (%) | | | | | | | |
| Fish meal (65%P) | 10 | | | 10 | | 10 | 10 | 10 | |
| Soybean meal (44%p) | 53.41 | | | 44.11 | | 34.81 | 25,51 | 16.21 | |
| Yellow corn meal | 26.59 | | | 30.01 | | 33.43 | 36.85 | 40.27 | |
| Fermented banana peels | - | | | 5.88 | | 11.76 | 17.64 | 23.52 | |
| Fish oil | 3.00 | | | 3.00 | | 3.00 | 3.00 | 3.00 | |
| Soya oil | 3.00 | | | 3.00 | | 3.00 | 3.00 | 3.00 | |
| Premix1 | 3.00 | | | 3.00 | | 3.00 | 3.00 | 3.00 | |
| Cr2O3 | 1.00 | | | 1.00 | | 1.00 | 1.00 | 1.00 | |
| Total | 100.00 | | | 100.00 | | 100.00 | 100.00 | 100.00 | |
| Proximate composition (%) | |  |  | |  | | | |
| Dry matter | 89.87 | | | 90.37 | | 89.44 | 89.87 | 87.84 | |
| Crude protein | 30.18 | | | 30.64 | | 30.70 | 30.84 | 30.23 | |
| Crude lipid | 8.46 | | | 8.29 | | 8.13 | 7.98 | 7.82 | |
| Fiber | 5.99 | | | 6.13 | | 6.12 | 5.83 | 5.07 | |
| Ash | 12.08 | | | 10.81 | | 9.35 | 8.10 | 7.43 | |
| Nitrogen free extract2 | 43.29 | | | 44.13 | | 45.7 | 47.25 | 49.45 | |
| Gross energy (Kcal. kg-1)3 | 4201.24 | | | 4248.92 | | 4302.03 | 4359.63 | 4401.72 | |

1Vitamin and mineral premix (kg-1 diet): A, 5,000 IU; D3, 1,000 IU; E, 5,000 mg; K, 2,000; B1, 2,500 mg; B2, 1,000 mg; B6, 1,000 mg; B12, 10 mg; inositol, 1000 mg; pantothenic acid, 3,000 mg; niacin acid, 3,000 mg; C, 10,000 mg; folic acid, 300 mg; biotin, 10 mg; calcium phosphate, 80; calcium lactate, 100; ferrous sulfate, 1. 24; potassium chloride, 0.23; potassium iodine, 0.23; copper sulfate, 1.2; manganese oxide, 1.2; cobalt carbonate, 0.2; zinc oxide, 1.6; magnesium chloride, 2.16; sodium selenite, 0.10. 2NFE (nitrogen free extract) = 100 – (% moisture + % protein + % fat + % ash + % fiber). 3Gross energy value was calculated based on combustion values of 5.65 protein, 9.45 fat, and 4.1 kcal g-1 carbohydrates (NRC, 2011).

**Table 3**. Growth performance, feed utilization, and survival rate of Basa Fish (*Pangasius bocourti*) fed with experimental diets for 84 days.

| **Parameters** | **Experimental diets** | | | |  |
| --- | --- | --- | --- | --- | --- |
| **CON.** | **FBP25%** | **FBP50%** | **FBP75%** | **FBP100%** |  |
| Initial weight (g) | 7.5±0.50 | 7.5±0.24 | 7.5±0.47 | 7.5±0.41 | 7.5±0.11 |
| Final weight (g) | 42.38 ±0.16a | 41.0 ±0.13ab | 41.12 ±0.15ab | 38.26 ±0.04c | 32.39±0.11d |
| Weight gain (g) | 34.88 ±0.16a | 33.5±0.06ab | 33.62 ±0.11ab | 30.26 ±0.14c | 24.89±0.14d |
| ADG (g day-1) | 0.42±0.00a | 0.40±0.01ab | 0.40±0.01ab | 0.36±0.01c | 0.30±0.01d |
| SGR (% day-1) | 2.06 ±0.05a | 2.02 ±0.01ab | 2.02 ±0.03ab | 1.94±0.05c | 1.74±0.00d |
| F I g/ fish | 73.25 ±0.01a | 72.03±0.02a | 73.29 ±0.1a | 82.00±0.03b | 74.17 ±0.03b |
| FCE (%) | 47.61 ± .01a | 46.50 ±.01a | 45.87 ±0.67b | 36.90 ±0.01c | 33.56 ±0.01d |
| FCR | 2.10 ± .01a | 2.15 ±1.41a | 2.18±0.67a | 2.71±0.54b | 2.98±0.04b |
| PER | 1.58 ±0.03a | 1.52 ±0.04a | 1.49 ±0.01b | 1.20±0.01c | 1.11±0.01d |
| Survival rate (%) | 100 | 100 | 100 | 100 | 100 |

Means in the same row followed by the same letter did not differ statistically (p < 0.05).

**Table 4. Apparent digestibility coefficient for Basa Fish (*Pangasius bocourti*) fed the experimental diets.**

| Variables | Control | Experimental diets | | |  |
| --- | --- | --- | --- | --- | --- |
|  | 25%FBP | 50%FBP | 75%FBP | 100%FBP |
| CP (%) | 92.90±0.20d | 97.90± 0.50a | 96.70± 0.50 b | 94.91±0.50c | 90.0±0.50d |
| GE (kcal kg−1) | 93.85±0.43d | 98.63±1.29a | 95.43±1.29b | 94.43±1.29c | 90.0±0.50d |
| Dry matter (%) | 91.80±0.89d | 94.30±1.68a | 93.70±1.68 b | 92.80± 1.68 c | 91.0 ±0.50d |

Means in the same row followed by the same letter did not differ statistically (p < 0.05).

| **Variables** | Control | **25%** | **50%** | **75%** | **100%** |  |
| --- | --- | --- | --- | --- | --- | --- |
| Glucose (mg dL-1)* | 66.71± 2.48d | 94.91± 2.68a | 78.75 ± 4.56b | 69.46 ± 2.67c | 62.46 ± 1.47 d |  |
| Triglyceride  (mg dL-1) * | 203.58±11.31c | 246.49±5.83b | 249.18 ±11.18a | 204.10±11.41c | 200.10±10.11d |  |
| Total protein  (mg dL-1)** | 4.41±0.19 a | 4.05 ± 0.17 b | 3.84 ± 0.27 b | 4.17 ± 0.31 b | 4.17 ± 0.31b |  |
| A Albumin (g dL-1) * | 0.81±0.10 b | 0.93 ± 0.05 a | 0.87 ± 0.05 b | 0.80 ± 0.09 b | 0.80 ± 0.09 b |  |
| Cholesterol  (mg dL-1) * | 208.08±13.55a | 133.55±6.72d | 163.65±14.72c | 172.83±13.40b | 172.83±13.4b |  |
| **Hepatic variables** | | | | | |  |
| Glycogen (μmoles)* | 13.49 ± 0.77c | 18.15± 0.88a | 17.49 ± 0.99b | 13.45± 0.89c | 13.45±0.89c |  |
| AST(U L-1)* | 1.99 ± 0.35 a | 1.14 ± 0.38 b | 1.11± 0.16 b | 1.92±0.15 a | 1.92±0.15a |  |

**Table 5.** Biochemical, hepatic, and digestible enzyme variables of Basa fish (*Pangasius bocourti*) fed diets containing different levels of fermented banana peels (FBP) for 84 days.

Glucose and triglycerides are expressed as mg dL−1, T Pr (total proteins) and albumin are expressed as g dL−1, amino acids is expressed as μmol mL-1, cholesterol is expressed as mg dL−1, glycogen is expressed as μmoles glucose g tissue-1, AST (aspartate aminotransferase) is expressed as U L-1 and amylase and Alk protease (alkaline protease) enzymes are expressed in UI mg protein−1. Means in the same row followed by the same letter did not differ statistically (p < 0.05). Asterisk (*) indicate linear regression. Double Asterisk (**) indicate quadratic regression. Equations: Glucose: y=62.660 + (0.821x), R2=0.80; Triglycerides: y=204.452+ (1.636x), R2=0.71; TPr: y=4.444 – (0.054x) + (0.0013x2), R2=0.95; Albumin: y=0.798 + (0.0039x), R2=0.80; Cholesterol: y=202.418 – (1.978x), R2=0.88; Glycogen: y=13.162 + (0.167x), R2=0.90; AST: y=1.946 – (0.031x), R2=0.72;

**Table 6.** Haematological variables of Basa fish (*Pangasius bocourti*) fed with diets containing different levels of the Fermentation Peel banana meal (FBP) for 84 days.

| **Variables** | **Control** | **25%** | **50%** | **75%** | **100%** |
| --- | --- | --- | --- | --- | --- |
| Hct (%)* | 28.17 ± 0.75 | 28.08 ± 0.54 | 27.09 ± 0.68 | 26.91 ± 0.58 | 25.56 ±0.08 |
| Ery  (106 μL−1) * | 1.50 ± 0.08c | 1.48 ± 0.09c | 1.54 ± 0.08b | 1.65 ± 0.12a | 1.60 ±0.02a |
| Hb  (g dL−1) * | 24.05 ± 0.79 | 24.41 ± 0.77 | 23.60 ± 0.90 | 23.19 ± 0.84 | 23.79 ±0.80 |
| MCV  (fL) * | 194.12 ± 3.23a | 195.17 ±10.30a | 175.75 ± 9.81b | 172.48 ± 13.11c | 169.43 ±13.11d |
| MCH  (pg)* | 162.33 ± 9.39b | 166.24 ±12.05a | 158.56 ± 8.27c | 147.02 ± 8.87d | 146.08±7.37d |
| MCHC  (g dL−1)** | 85.64 ± 2.69 c | 87.21 ± 3.16 a | 86.84 ± 4.24 b | 85.77 ± 3.77c | 84.72 ±2.46c |

Hct (Hematocrit) is expressed as %, Ery (erythrocyte) concentration is expressed as 106 μL−1, Hb (hemoglobin) concentration and MCHC (mean corpuscular hemoglobin concentration) are expressed as g dL−1, MCV (mean corpuscular volume) is expressed in fL and MCH (mean corpuscular hemoglobin) is expressed in pg. Different letters indicate statistical difference between treatments (Tukey’s test, P < 0.05; n=12 fish per treatment). NS=not significant. Asterisk (*) indicate linear regression. Double Asterisk (**) indicate quadratic regression. Equations: Hct: y=28.170 – (0.046x), R2=0.84; Ery: y=1.427 + (0.011x), R2=0.81; Hb: y=24.404 - (0.053x), R2=0.84; MCV: y=200.654 - (1.507x), R2=0.88; MCH: y=170.658 - (1.180), R2=0.80; MCHC: y=85.757 + (0.218x) – (0.009x2), R2=0.98.

| **Digestible enzymes (Ul mg-1)** | Control | 25% FBP | 50%FBP | 75%FBP | 100%FBP |
| --- | --- | --- | --- | --- | --- |
| Amylase (Ul mg-1)* | 5.02 ± 0.58 | 5.96 ± 0.56 | 6.02 ± 0.65 | 5.13 ± 0.50 | 5.13 ± 0.50 |
| Protease(Ul mg-1)* | 5.02 ± 0.58 | 5.02 ± 0.58 | 5.02 ± 0.58 | 5.02 ± 0.58 | 5.02 ± 0.58 |
| Lipase(Ul mg-1)* | 3.06 ± 0.17 | 3.55 ± 0.28 | 3.71 ± 0.10 | 3.35 ± 0.38 | 3.42 ± 0.32 |

**Table 7.** Digestive Enzyme Activity of Basa fish (*Pangasius bocourti*) fed with diets containing different levels of the Fermentation Peel banana meal (FBP) for 84 day

Asterisk (*) indicate linear regression. Double Asterisk (**) indicate quadratic regression. Equations Amylase: y=4.988 + (0.035), R2=0.91; Protease: y=5.244 + (0.018x), R2=0.74.

**Table 8.** Economic Evaluation of experimental diets used in the study.

| **Items** | **Experimental diets ( FBP)** | | | | |
| --- | --- | --- | --- | --- | --- |
| Control | **25% FBP** | **50% FBP** | **75% FBP** | **100%FBP** |
| Cost/kg diet 1 | 33.20 | 32.08 | 30.96 | 29.83 | 28.71 |
| FI (g) | 73.25 | 72.03 | 73.25 | 82 | 74.17 |
| Feed cost (LE/kg)1 | 24.24 | 23.10 | 22.60 | 24.46 | 21.25 |
| Relative to feed cost (%)2 | 99.10 | 94.43 | 92.40 | 100 | 86.88 |
| Consumed feed to produce 1kg fish (kg)2 | 2.1 | 2.15 | 2.18 | 2.71 | 2.98 |
| Feed cost/kg gain3 | 69.72 | 68.97 | 67.49 | 80.84 | 85.56 |
| Reduction cost in kg gain (%)4 | 81.41 | 80.61 | 78.88 | 94.48 | 100 |

1. Feed cost × Feed intake.
2. Relative % of feed cost/ kg gain.
3. Feed cost per kg fresh fish (LE) = Step 1X step 2
4. Relative % of feed cost/ kg fish = Respective figures for step 3/ highest figure in this step
